# Expanded view of the ecological genomics of ant responses to climate change

Matthew K. Lau<sup>1</sup>, Aaron M. Ellison<sup>1</sup>, Andrew Nguyen<sup>2,3</sup>, Clint Penick<sup>4,5</sup>, Bernice DeMarco<sup>6</sup>, Nicholas J. Gotelli<sup>2</sup>, Nathan J. Sanders<sup>7</sup>, Robert Dunn<sup>4</sup>, and Sara Helms Cahan<sup>2</sup>

<sup>1</sup>Harvard Forest, Harvard University, Petersham, MA, USA

<sup>2</sup>Department of Biology, University of Vermont, Burlington, VT, USA

<sup>3</sup>Department of Entomology and Nematology, University of Florida, Gainesville, FL, USA

<sup>4</sup>Department of Applied Ecology, North Carolina State University, Raleigh, NC, USA

<sup>5</sup>The Biomimicry Center, Arizona State University, Tempe, AZ, USA

<sup>6</sup>Smithsonian Institution, Washington, DC, USA

<sup>7</sup>Environmental Program, Rubenstein School of Environment and Natural Resources, University of Vermont, Burlington, VT, USA

Corresponding author:

Matthew K. Lau

Email address: [matthewklau@fas.harvard.edu](mailto:matthewklau@fas.harvard.edu)

## ABSTRACT

Ecological genomics provides a window into potential responses of organisms to environmental change. Given the abundance, broad distribution and diversity of roles that ants play in many ecosystems, they are an ideal group to serve as ecosystem indicators of climatic change. At present, only a few whole-genome sequences of ants are available (19 of > 16,000 species), mostly from tropical and sub-tropical regions. To address this, we sequenced the genomes of seven whole colonies of six species from the genus *Aphaenogaster*: *A. ashmeadi*, *A. floridana*, *A. fulva*, *A. miamiana*, *A. picea*, and *A. rudis*. The geographic ranges of these species collectively span eastern North America from southern Florida to southern Canada, which comprises a latitudinal gradient in which many climatic variables are changing rapidly. For the six genomes, we assembled an average of 271,039 contigs into 47,337 scaffolds. The mean genome size was 270 Mb, which was comparable to that of other sequenced ant genomes (212.83 to 396.03 Mb). Looking across all currently sequenced ant genomes, we found support for a relationship between biogeographic variables and genome similarity and size. The strongest correlations were between genomic similarity and two main groups of climate variables relating to cold temperatures and precipitation. These results point to climate as a mechanism leading to genomic differences in ants and provide a point of departure for future work that explores the responses of ants to climatic change at the interface of ecology and evolution.

## INTRODUCTION

Understanding how terrestrial ecosystems will respond to ongoing shifts in climatic variables, such as temperature and precipitation, will improve our ability to manage communities and mitigate impacts of climatic change. The mean global temperature is currently on track to meet or exceed that predicted by the most extreme forecasting models (Brown and Caldeira, 2017). Climatic change is also pushing local conditions outside the boundaries of historic ranges, potentially leading to combinations of species or entire ecosystems that have no contemporary analogs that are challenging to predict accurately (Burrows et al.,

2014). Also, as climate driven impacts on evolutionary responses are likely to occur over contemporary time-scales, there is a need for a comprehensive study of the genetic basis of species' climate responses to understand and potentially predict the responses of ecosystems to climate change (Parmesan, 2006; Diamond and Chick, 2018).

The biodiversity of most terrestrial systems is great enough to be intractable to study in its entirety. To deal with this, researchers often study 'indicator' species whose responses to environmental change are broadly representative of a much wider range of taxa (Siddig et al., 2016). Ants (Formicidae) are widely used as indicator taxa (Agosti et al., 2000) because they play key roles in community dynamics and ecosystem processes, including key interactions, such as seed dispersal and the movement of soil via colony construction (Del Toro et al., 2012). Ants are also responsive to changes in temperature and other climatic variables via individual responses, changes in social structure and community assembly (Spicer et al., 2017; Diamond et al., 2017; Diamond and Chick, 2018). Seed dispersers in particular are likely to respond to climate change, as there is evidence demonstrating that climate change may have strong negative impacts on female individuals of dioecious plant species (Hultine et al., 2016). This is leading to decreased abundance of female individuals and reductions in seed production with potentially cascading impacts on associates, including seed dispersers such as myrmecochorus ants.

In eastern North America and temperate Asia, species of the genus *Aphaenogaster* are abundant understory ants that play key roles in the dispersal of seeds. Previous studies have shown *Aphaenogaster* species respond to climatic change, and the response of these species to climatic change appears to depend both on the species being studied and on the geographic region in which climatic change occurs. Warren and Chick (2013) found that shifts in the distribution of two *Aphaenogaster* species, *A. rudis* and *A. picea*, were determined by minimum temperatures. Diamond et al. (2016) reported that the rate of colonization and occupancy of nests by *Aphaenogaster* species in a five-year experimental warming study (Pelini et al., 2014) declined with temperature in the warm, southern study site (Duke Forest, NC, USA) but not in the cooler, northern study site (Harvard Forest, MA, USA).

In addition to ants serving as indicators of ecological impacts of climatic change, ant genetics may provide insights into the potential responses of ant assemblages. One study has found that ant colony development is experiencing climate related selection pressure (Penick et al., 2017) and previous work has demonstrated that phylogenetics is a factor determining the response of ant species to climatic change (Diamond et al., 2012). A comparative study of the southern, more warm-adapted, *A. carolinensis* displayed a greater reduction in the regulation of suites of genes in response to experimental warming than did the cold-adapted *A. picea* (Stanton-Geddes et al., 2016), suggesting a genetic component to temperature response. At the macroevolutionary scale, there is evidence for temporal synchrony in major

transitions of terrestrial plant communities and the diversification of ant lineages. Moreau (2006) showed that the evolution of *Aphaenogaster* was coincident with the shift from gymnosperm to angiosperm dominated forests in the early to middle Paleogene.

Although these and other studies (see Nygaard and Wurm (2015)) support the perspective that a more complete knowledge of ant genetics will increase our understanding of ant responses to environmental change (Boomsma et al., 2017), at present relatively few ant species have been sequenced —20 in total, of which 19 are currently available in the NCBI Genome Database (accessed April 1 2018). Of these, most are from tropical and subtropical assemblages, and all but five represent unique genera (the exceptions being two species of *Atta* and three of *Trachymyrmex* (Figure 1). No species of *Aphaenogaster* have yet been sequenced.

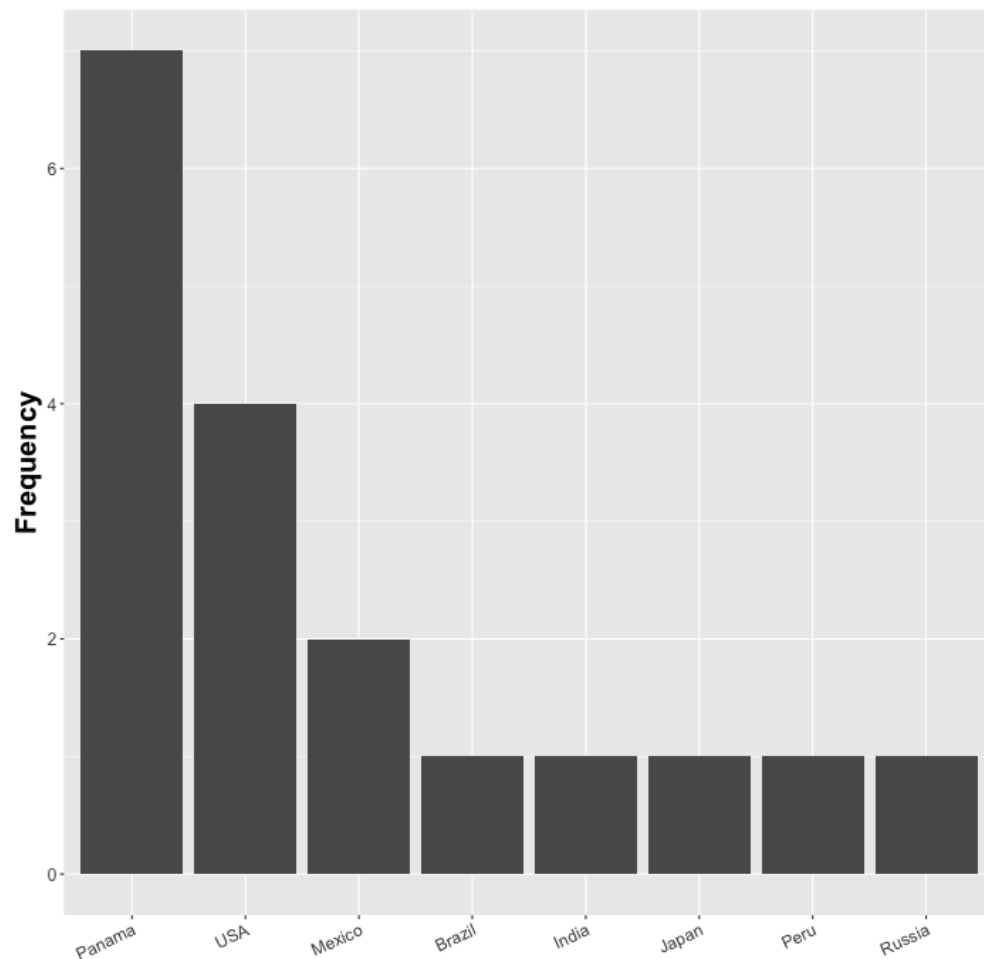

**Figure 1.** Number of whole-genome sequences available in NCBI (see Table for the list of NCBI accessions).

To increase the number of genomes of temperate-zone ant species for other genetic studies (e.g. short-read and target sequences or transcriptomics), we sequenced the entire genomes of six *Aphaenogaster*

|                                     | BioProject Accession | BioSample Accession |
|-------------------------------------|----------------------|---------------------|
| <i>Acromyrmex echinator</i>         | PRJNA62733           | SAMN02953789        |
| <i>Atta cephalotes</i>              | PRJNA48091           | SAMN02953774        |
| <i>Atta colombica</i>               | PRJNA343260          | SAMN03982875        |
| <i>Camponotus floridanus</i>        | PRJNA50201           | SAMN02953777        |
| <i>Cyphomyrmex costatus</i>         | PRJNA343963          | SAMN03982885        |
| <i>Dinoponera quadricaps</i>        | PRJNA301625          | SAMN02869781        |
| <i>Harpegnathos saltator</i>        | PRJNA50203           | SAMN00016742        |
| <i>Lasius niger</i>                 | PRJNA269328          | SAMN03253098        |
| <i>Linepithema humile</i>           | PRJNA45799           | SAMN02767796        |
| <i>Monomorium pharaonis</i>         | PRJDB3164            | SAMD00020277        |
| <i>Ooceraea biroi</i>               | PRJNA275884          | SAMN02428046        |
| <i>Pogonomyrmex barbatus</i>        | PRJNA45797           | SAMN02953770        |
| <i>Pseudomyrmex gracilis</i>        | PRJNA377720          | SAMN03219222        |
| <i>Solenopsis invicta</i>           | PRJNA49629           | SAMN02953778        |
| <i>Trachymyrmex cornetzi</i>        | PRJNA343972          | SAMN03982882        |
| <i>Trachymyrmex septentrionalis</i> | PRJNA343973          | SAMN03982881        |
| <i>Trachymyrmex zeteki</i>          | PRJNA343251          | SAMN03982884        |
| <i>Vollenhovia emeryi</i>           | PRJDB3517            | SAMD00026325        |
| <i>Wasmannia auropunctata</i>       | PRJDB3443            | SAMD00024919        |

**Table 1.** NCBI genome database accession information for the previously sequenced ant genomes.

species from eastern North America: *A. ashmeadi*, *A. floridana*, *A. fulva*, *A. miamiana*, *A. picea* and *A. rudis*. These species were collected from across a broad biogeographic gradient spanning 10 degrees of longitude and 12 degrees of latitude. With the these new whole-genome sequences and the full set of publicly available ant genomes (NCBI), we test two hypotheses about the factors influencing the distribution of ant genomes. First, to test the hypothesis that climate variables shape the distribution of ant genomes, we explored the correlation between spatial and multi-decadal climate variables. If evolutionary dynamics in ants have been influenced by environmental conditions, then ant genomes from more similar conditions will have more similar genomes. Second, as previous work has demonstrated patterns in the evolutionary dynamics of ant genome size (Tsutsui et al., 2008) and empirical studies of have reported biogeographic patterns in genome size in other arthropod taxa (e.g. Crustacea (Hultgren et al., 2018)), we also tested the hypothesis that ant genome size exhibits biogeographic patterns. Because previous studies of ant genome size suggest that selection can act on genome size and that genome size is influenced by phylogeny (Tsutsui et al., 2008), we predicted that genome size similarity would also be positively correlated with environmental similarity. We present the results of this sequencing effort and use of the entire set of ant genomes to test the hypotheses of biogeographic patterns in ant genome sequence similarity and size.

## Whole-Genome Sequencing

Entire colonies of the six *Aphaenogaster* species were collected by A. Nguyen and C. Penick from field sites in eastern North America (Fig 2). Ants were identified to species and specimens from these colonies

are preserved at North Carolina State University and the Museum of Comparative Zoology at Harvard University. Individuals from each colony were isolated from nest material and debris, weighed, placed in 50 ml Falcon centrifuge tubes and immediately flash frozen in a  $-80^{\circ}\text{C}$  freezer. Colony weights were: 794.0 mg (*A. ashmeadi*), 652.0 mg (*A. floridana*), 520.0 mg (*A. fulva*), 749.0 mg (*A. picea*), 862.0 mg (*A. miamiana*), 280.0 mg (*A. rudis* 1) and 236.0 mg (*A. rudis* 2).

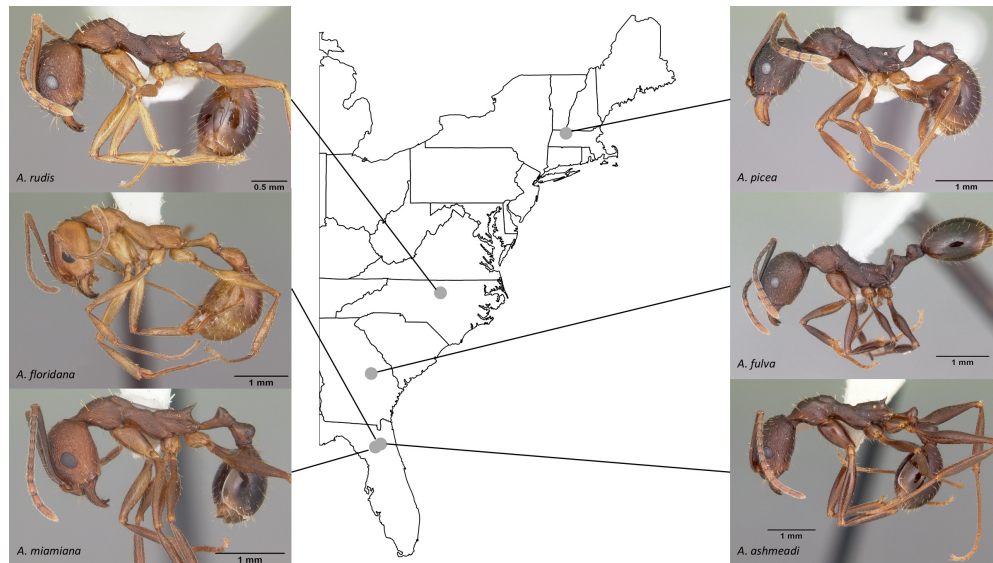

**Figure 2.** We sampled seven colonies representing six species of *Aphaenogaster* from across eastern North America (see Table 2). All photos by April Noble (available from <http://www.antweb.org>).

DNA was then extracted from each colony using methods developed previously for genomic sequencing of whole colonies of mosquitos (*Anopheles* spp.) (Neafsey et al., 2010) and sequenced using an Illumina HiSeq 2500 at the Broad Institute (Cambridge, MA, USA). A combination of fragment and jump sequences were used in combination to generate higher quality, long sequence reads. Raw sequences were processed to remove chimeric and contaminant sequences, screened for contaminants by BLAST searches to identify sequences with likely matches to non-target species (primarily *Wolbachia* and *Mycoplasma*), and assembled using ALLPATHS-LG (version R48559) (Gnerre et al., 2011). Additional assembly processing using Pilon (version 1.13) (Walker et al., 2014) was used to reduce base-call errors and gaps in coverage. On average, across all seven genomes, PILON reduced coverage gaps by 3.1% or 3.9 Mb. GAEMR (<http://www.broadinstitute.org/software/gaemr/>) software produced summary statistics of the final assembled genomes.

## Genome quality and composition

DNA extractions yielded substantial amounts of high quality DNA with concentrations and quality scores ranging from 3.45–5.39  $\text{ng}\mu\text{L}^{-1}$  and 4.05–4.27  $\text{ng}\mu\text{L}^{-1}$ , respectively. All genome assemblies displayed good coverage, with an average of 70% of fragments mapped (Table 3). Across all species,

|                                | Lat   | Lon    | Tmin (C) | Tmax (C) | Precip (mm) |
|--------------------------------|-------|--------|----------|----------|-------------|
| <i>Aphaenogaster ashmeadi</i>  | 29.79 | -82.03 | 6.11     | 33.13    | 1290.40     |
| <i>Aphaenogaster floridana</i> | 29.79 | -82.03 | 6.11     | 33.13    | 1290.40     |
| <i>Aphaenogaster fulva</i>     | 32.69 | -82.51 | 1.83     | 33.81    | 1156.81     |
| <i>Aphaenogaster miamiana</i>  | 29.66 | -82.30 | 5.87     | 32.75    | 1254.72     |
| <i>Aphaenogaster picea</i>     | 42.60 | -72.58 | -11.11   | 28.12    | 1199.06     |
| <i>Aphaenogaster rudis1</i>    | 36.02 | -78.98 | -1.82    | 31.60    | 1168.41     |
| <i>Aphaenogaster rudis2</i>    | 36.02 | -78.98 | -1.82    | 31.60    | 1168.41     |

**Table 2.** Climate variables for colony sample sites. Climate are 30 year normal values (1976-2016) for January minimum temperature (Tmin), July maximum temperature (Tmax) and total precipitation (Precip) extracted from the PRISM (PRISM Climate Group, Oregon State University, USA).

the length of the shortest contig at 50% of the genome (i.e. N50) was 18,864 bases; average assembly GC content was 38.18%; and average genome size was 471 Mb. Using a BLAST search of the contigs and the NCBI sequence database, we found that 38.98% and 22.04% of the top hits were “ant” and *Aphaenogaster*, respectively. Both raw sequences and the assembled genomes are currently stored at Harvard Forest (Petersham, MA, USA) and NCBI’s genome database (Embargoed Genome Accessions NJRK000000000-NJRQ000000000 and BioSample Accessions SAMN06892346-SAMN06892352).

|                            | <i>A. ashmeadi</i> | <i>A. floridana</i> | <i>A. fulva</i> | <i>A. miamiana</i> | <i>A. picea</i> | <i>A. rudis1</i> | <i>A. rudis2</i> |
|----------------------------|--------------------|---------------------|-----------------|--------------------|-----------------|------------------|------------------|
| Total Scaffold Length (Mb) | 310.33             | 382.86              | 346.13          | 342.64             | 386.04          | 395.41           | 429.70           |
| Coverage (%)               | 81.46              | 71.88               | 70.70           | 77.40              | 67.47           | 66.49            | 65.59            |
| Scaffold N50 (bp)          | 336807.00          | 439114.00           | 255328.00       | 351517.00          | 322984.00       | 300103.00        | 269776.00        |
| Scaffolds                  | 5087.00            | 6422.00             | 7031.00         | 6920.00            | 6808.00         | 7404.00          | 7665.00          |
| Max Gap (bp)               | 13070.00           | 15108.00            | 12104.00        | 11453.00           | 14952.00        | 18586.00         | 24564.00         |
| Captured Gaps              | 26350.00           | 30858.00            | 32881.00        | 28801.00           | 36417.00        | 34062.00         | 34313.00         |
| Total Gap Length (Mb)      | 57.69              | 107.89              | 101.40          | 77.64              | 125.15          | 131.71           | 148.75           |
| Total Contig Length (Mb)   | 252.64             | 274.96              | 244.73          | 265.00             | 260.90          | 263.70           | 280.95           |
| Contig N50 (bp)            | 21677.00           | 23448.00            | 15753.00        | 20738.00           | 15440.00        | 15622.00         | 18941.00         |
| Contigs                    | 31437.00           | 37280.00            | 39912.00        | 35721.00           | 43225.00        | 41466.00         | 41978.00         |
| Assembly GC (%)            | 38.27              | 38.03               | 38.39           | 38.21              | 38.32           | 38.25            | 37.88            |
| Contaminants (%)           | 0.30               | 0.24                | 0.02            | 0.26               | 1.14            | 1.25             | 0.61             |

**Table 3.** Sequencing statistics for the genomes of the sequenced colonies of *Aphaenogaster*.

The *Aphaenogaster* genomes compared well with other ant genome sequences retrieved from the NCBI database. The sizes of the *Aphaenogaster* genomes were within the range of flow-cell cytometry estimates of the genome size of a larger set of both ant and other insect species (Tsutsui et al., 2008) (Fig 3A). The size of the scaffolds were within the range recommended for gene coverage based on Efron and Tibshirani (2007) (Fig 3B).

We observed patterns in genomic composition that generally were consistent with expectations based on phylogenetic relatedness. After detecting and masking repeat regions in the *Aphaenogaster* genomes using *Repeatmasker* (version 4.0.5 Institute for Systems Biology), we applied MASH distance (Ondov et al., 2016) to measure pairwise dissimilarity of genomic sequences. The MASH method extends a data compression and dimensionality-reduction algorithm to generate estimates of sequence similarity with low computational overhead. Briefly, the pairs of genomic sequences were pre-processed into sets of k-mers of size 21 with the size of the non-redundant hashes retained set to 1,000. These settings have



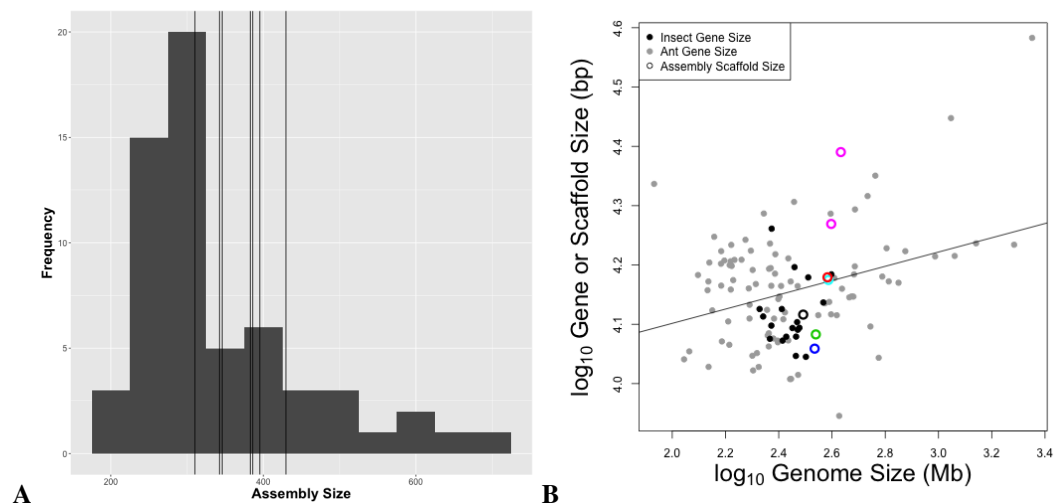

**Figure 3.** The size of sequenced *Aphaenogaster* genomes and the average scaffold size were within the size range of previously published observed or estimated genomes of ants and other insects. (A) Frequency distribution of previously published genome size estimates using flow cytometry; vertical lines identify the sizes of the *Aphaenogaster* assemblies. (B) A log-log plot of the whole-genome size and scaffold sizes of the *Aphaenogaster* genomes, along with those of ants and other insects (Tsutsui et al., 2008). *Aphaenogaster* genomes are indicated by open circles with the following colors: dark blue = *A. ashmeadi*, light blue = *A. floridana*, black = *A. fulva*, green = *A. miamiana*, *A. picea* = red and *A. rudis* = pink (see Table 3 for scaffold size information).

144 been demonstrated to provide good representation of genomic similarity with minimal computational  
 145 costs (Ondov et al., 2016). These sets were then used to estimate the Jaccard similarity coefficient (the  
 146 ratio of shared k-mers to total k-mers) of subsampled k-mer pairs of genomes. This unbiased estimate of  
 147 the Jaccard similarity ( $J$ ) was then used to calculate the dissimilarity of the two genomes ( $D$ ) as  $D = 1 - J$ .  
 148 All Jaccard similarity estimates had  $p$ -values less than  $10^{-14}$ , which is below the recommended  $10^{-3}$   
 149 probability of observing values of  $J$  due to chance.

150 Using the MASH genomic distances, we observed patterns of genomic similarity in-line with expecta-  
 151 tions from established ant phylogenetics. Sequences formed groups that corresponded with subfamily  
 152 (Fig 4). *Aphaenogaster* clustered with other genera from the *Myrmicinae* and, in general, subfamily  
 153 level clustering tended to follow previously observed patterns of subfamily relatedness (Bolton, 2006;  
 154 Moreau, 2006; Ward, 2014). The *Aphaenogaster* sequences formed a single cluster containing only  
 155 *Aphaenogaster* species and displayed intra-generic levels of genomic variance comparable to other genera  
 156 (e.g., *Trachymyrmex* spp.). The separation of the two *A. rudis* species was initially surprising, as these two  
 157 samples were collected at the same site (Duke Forest, NC USA) and were identified as the same species  
 158 based on their morphological characteristics (Ellison, 2012; DeMarco and Cognato, 2016). However, two  
 159 recent studies of targeted gene regions have demonstrated the polyphyletic nature of *Aphaenogaster rudis*.  
 160 One study of the evolution of the subfamily *Myrmicinae* observed that the genus as a whole could be split  
 161 into at least four different lineages (Ward et al., 2015). Another, more detailed study of the genus in North

America found that multiple individuals of *A. rudis* separated out into distinct groupings, each with other species, specifically, individuals of *A. rudis* from North Carolina (USA) were observed to form distinct clusters with individuals of *A. carolinensis*, *A. miamiana*, *A. lamellidens* and *A. texana* (DeMarco and Cognato, 2016).

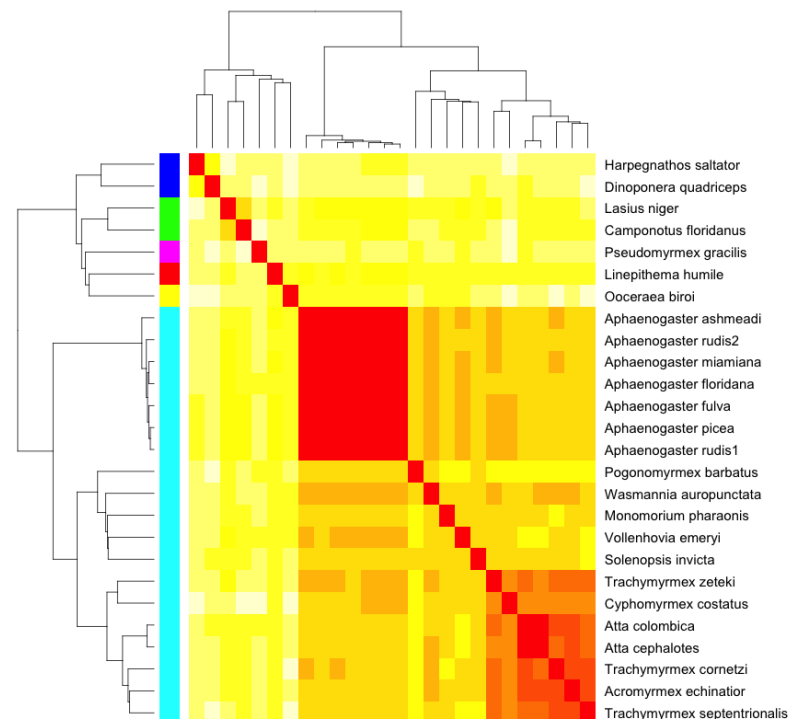

**Figure 4.** Heatmap of the MASH genomic distances of the *Aphaenogaster* species that we sampled together with other ant species in NCBI. Heat colors shown in the central matrix range from high (white = 1) through moderate (orange = 0.5) to low (red = 0) genomic distance; the diagonal is entirely red because it illustrates the distance of each sequence to itself. The cladograms on the left and top show hierarchical clustering of the genomes. Colors shown to the left of the matrix indicate ant subfamilies: *Ponerinae* (dark blue), *Formicinae* (green), *Pseudomyrmecinae* (pink), *Dolichoderinae* (red), *Dorylinae* (yellow), *Myrmicinae* (light blue).

## Biogeographic Patterns of Genomic Structure

To examine these relationships, we conducted multivariate correlation analyses (Mantel Tests) of inter-species whole-genome size similarity using the Euclidean distance of whole-genome length (total base pairs) and genomic similarity (MASH distance) with the Euclidean distances of standardized climate variables. More specifically, we conducted directional ( $H_0$ : Mantel  $r \leq 0$ ) partial mantel tests to control for spatial autocorrelation by including geodesic distance as a term (Goslee and Urban, 2007). Data for climate variables for each sampling location from the WorldClim database (version 2.0) at a 2.5 arc minute spatial resolution from the years 1970 to 2002 (Fick and Hijmans, 2017) (Table 4).

Using a permutational multivariate analysis of variance (PerMANOVA) procedure, we parsed the



| WorldClim Variable                          | BIO Number |
|---------------------------------------------|------------|
| Annual Mean Temperature (MAT)               | BIO1       |
| Mean Diurnal Range (MDR)                    | BIO2       |
| Isothermality (Iso)                         | BIO3       |
| Temperature Seasonality (TS)                | BIO4       |
| Max Temperature of Warmest Month (Tmax)     | BIO5       |
| Min Temperature of Coldest Month (Tmin)     | BIO6       |
| Temperature Annual Range (ATR)              | BIO7       |
| Mean Temperature of Wettest Quarter (MTWeQ) | BIO8       |
| Mean Temperature of Driest Quarter (MTDQ)   | BIO9       |
| Mean Temperature of Warmest Quarter (MTWaQ) | BIO10      |
| Mean Temperature of Coldest Quarter (MTCQ)  | BIO11      |
| Annual Precipitation (PA)                   | BIO12      |
| Precipitation of Wettest Month (PWM)        | BIO13      |
| Precipitation of Driest Month (PDM)         | BIO14      |
| Precipitation Seasonality (PS)              | BIO15      |
| Precipitation of Wettest Quarter (PWeQ)     | BIO16      |
| Precipitation of Driest Quarter (PDQ)       | BIO17      |
| Precipitation of Warmest Quarter (PWaQ)     | BIO18      |
| Precipitation of Coldest Quarter (PCQ)      | BIO19      |

**Table 4.** WorldClim variables, abbreviations and numbers for the climate variables used in the analysis of size and MASH similarity of ant genomes.

individual variables that were correlated with both genome size and MASH similarity. PerMANOVA is a flexible multivariate analog of ANOVA that permits the use of a wider set of similarity metrics to be used for the response matrix (Anderson, 2001), such as the MASH distance. We ran a total of 10,000 permutations of the original distance matrices for each statistical permutation procedure. We chose a subset of all possible climate variables available via WorldClim for this analysis. A visual inspection of the sampled climate variable correlations indicated that the primary climate variables, mean annual temperature (MAT), annual minimum temperature, annual maximum temperature, annual precipitation and summer precipitation, represented the majority of climate variation (5). Based on this, we only included these variables, along with latitude and longitude coordinates, as factors in the PerMANOVAs.

To visualize the patterns of genomic similarity and spatio-climate variation, we used non-metric multidimensional scaling (NMDS) ordination to the MASH genomic distances using 500 iterations to produce a two-dimensional lowest stress solution for all genomes and only the *Aphaenogaster* genomes, respectively. The  $R^2$  and stress of the final solutions were 0.80 and 15%. The geographic (latitude and longitude) and WorldClim climate variables were then correlated with both sets of MASH genomic distances (i.e. all and just *Aphaenogaster*) using a vector analyses (Oksanen et al., 2016).

We found significant global, biogeographic patterns of ant species genomes. Across all whole-genome ant sequences (both the NCBI and the newly sequenced *Aphaenogaster* species), ants from climatically similar locations tended to have similar genomes (Fig 6). We also observed that collection location climate similarity was significantly correlated with genome size similarity (Mantel  $r = 0.19$ ,  $p$ -value = 0.021) and

194 whole genome similarity (MASH distance) (Mantel  $r = 0.3248169$ ,  $p$ -value = 0.001).

195 Both space and climate were important factors determining the size and genomic similarity of  
196 the ant genomes. Longitude but not latitude was a significant predictor of genome size (Table 5).  
197 Temperature of the coldest (Tmin) and hottest (Tmax) month and total annual precipitation (PA), were  
198 all significant predictors of genomic size similarity, but neither mean annual temperature (MAT) nor  
199 summer precipitation (PS) were significant predictors of genome size. Overall, Tmin was the strongest  
200 predictor with an  $R^2$  of 0.23. Latitude and longitude were both correlated with MASH genome distance;  
201 and all climate variables examined were significant predictors of whole-genome similarity with Tmin  
202 ( $R^2 = 0.10$ ) also being the strongest predictor. Interestingly, when the newly sequenced *Aphaenogaster*  
203 genomes were excluded from the analysis, climate was not correlated with genome size similarity (Mantel  
204  $r = 0.13$ ,  $p$ -value = 0.190) and only annual precipitation (PA) was a significant predictor of genome size  
205 similarity, and longitude and mean annual temperature (MAT) were significant predictors of MASH  
206 genomic similarity (Supplementary Materials Table 1).

|                      | <i>df</i> | <i>SS</i> | <i>MS</i> | <i>Pseudo-F</i> | <i>R</i> <sup>2</sup> | <i>p-value</i> |
|----------------------|-----------|-----------|-----------|-----------------|-----------------------|----------------|
| <i>Size Distance</i> |           |           |           |                 |                       |                |
| Lat                  | 1         | 3360.41   | 3360.41   | 2.34            | 0.04                  | 0.1433         |
| Lon                  | 1         | 9238.80   | 9238.80   | 6.43            | 0.11                  | 0.0181         |
| MAT                  | 1         | 267.49    | 267.49    | 0.19            | 0.00                  | 0.6767         |
| Tmin                 | 1         | 20413.36  | 20413.36  | 14.21           | 0.23                  | 0.0025         |
| Tmax                 | 1         | 9081.67   | 9081.67   | 6.32            | 0.10                  | 0.0217         |
| PA                   | 1         | 17564.07  | 17564.07  | 12.23           | 0.20                  | 0.0034         |
| PS                   | 1         | 4368.07   | 4368.07   | 3.04            | 0.05                  | 0.0978         |
| Residuals            | 16        | 22985.41  | 1436.59   |                 | 0.26                  |                |
| Total                | 23        | 87279.28  |           |                 | 1.00                  |                |
| <i>MASH Distance</i> |           |           |           |                 |                       |                |
| Lat                  | 1         | 0.02      | 0.02      | 3.56            | 0.10                  | 0.0002         |
| Lon                  | 1         | 0.02      | 0.02      | 3.26            | 0.10                  | 0.0017         |
| MAT                  | 1         | 0.01      | 0.01      | 1.97            | 0.06                  | 0.0341         |
| Tmin                 | 1         | 0.02      | 0.02      | 3.30            | 0.10                  | 0.0004         |
| Tmax                 | 1         | 0.01      | 0.01      | 1.89            | 0.06                  | 0.0382         |
| PA                   | 1         | 0.01      | 0.01      | 1.97            | 0.06                  | 0.0276         |
| PS                   | 1         | 0.01      | 0.01      | 2.14            | 0.06                  | 0.0159         |
| Residuals            | 16        | 0.11      | 0.01      |                 | 0.47                  |                |
| Total                | 23        | 0.24      |           |                 | 1.00                  |                |

**Table 5.** PerMANOVA pseudo-F table for the analysis of the factors correlated with ant genome size and MASH distance.

## 207 COMPUTATION AND STATISTICS

208 Genomic distance (MASH) computations were run on the Odyssey cluster supported by the FAS Division  
209 of Science, Research Computing Group at Harvard University. All analyses were conducted in **R** (R Core  
210 Team, 2017). Analytical scripts for the project are available online at the Harvard Forest Data Archive

211 (<http://harvardforest.fas.harvard.edu/harvard-forest-data-archive>). We used the *vegan* (Oksanen et al.,  
212 2016) and *ecodist* (Goslee and Urban, 2007) packages in R for the multivariate analyses.

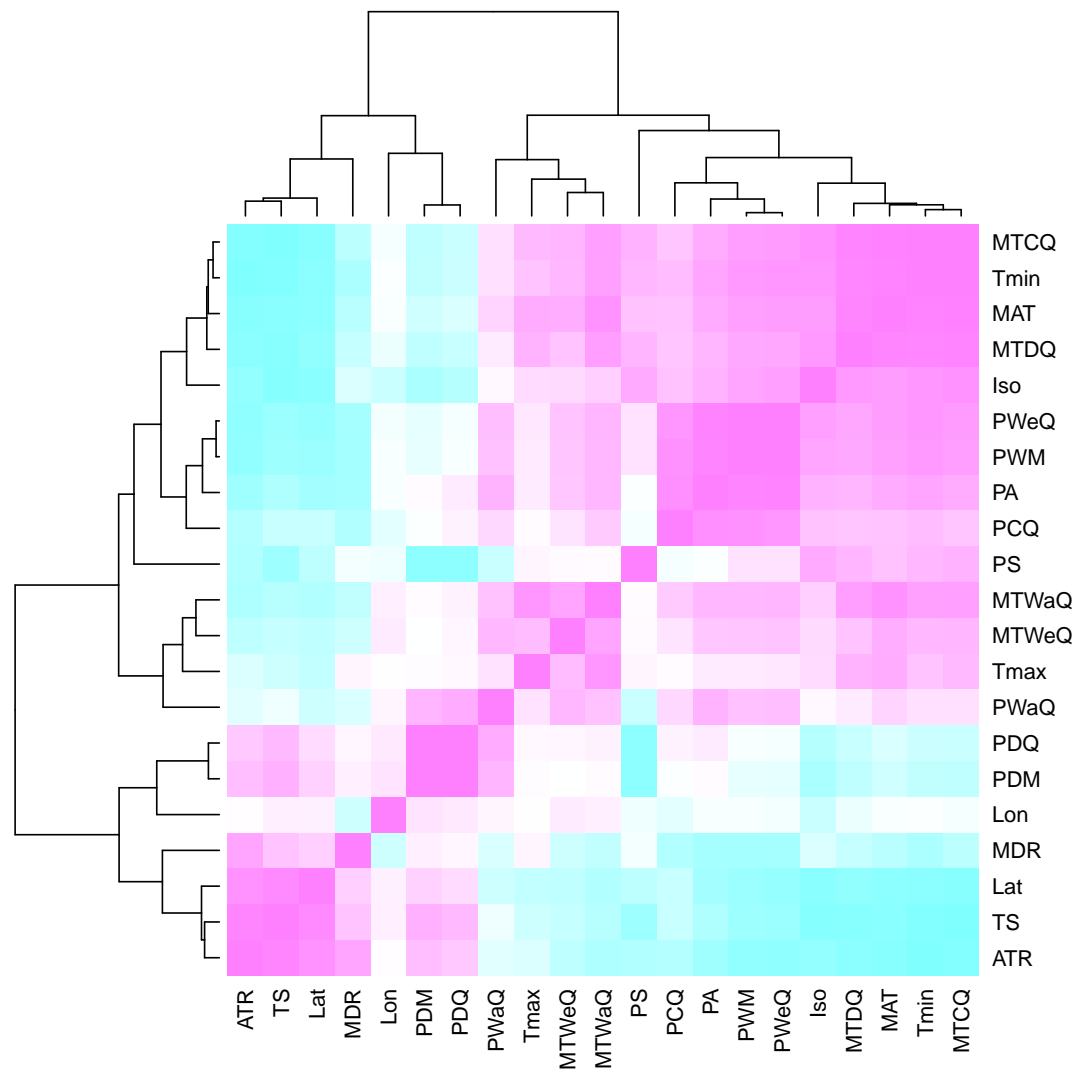

**Figure 5.** Heatmap of Pearson correlations among climate variables. Cells in the heatmap are colored by the correlation between the two variables that intersect at that location ranging from blue = -1 to white = 0 to pink = 1. The variables are arrayed by hierarchical clustering of the correlations, as shown by the dendrograms on the top and left side.



## DISCUSSION

We have produced seven draft whole-genome sequences of six species of ants in the genus *Aphaenogaster*. These are the first whole-genomes from a previously un-sequenced genus, adding to the sequences of the diverse “formicoid” clade, which contains 90% of all extant ant species (Ward, 2014). Our genomic sequences were comparable in quality to other ant and insect genomes and the patterns of genomic similarity were in line with expectations based on current ant systematics. With the addition of these sequences, we observed support for the hypotheses that genome size and similarity display spatial patterns that relate to climate. Genomic patterns across biogeographic gradients lend further weight to the importance of considering the genetic basis of climate change responses.

Our results support the overarching perspective that climate has been a force shaping the genetics of ant species. This is generally in-line with previous observations of physiological and ecological responses of ants to shifting temperatures (Warren and Chick, 2013; Stanton-Geddes et al., 2016; Diamond et al., 2016; Nguyen et al., 2017; Helms Cahan et al., 2017; Diamond et al., 2017; Penick et al., 2017). We observed a strong correlation between minimum temperature and genome size and genomic similarity (MASH). Although these results are correlative, they are also consistent with previous research on the climatic determinants of ant distribution in North America. For example, (Warren and Chick, 2013) found that cold and not warm temperatures limited shifts in the distributions of two *Aphaenogaster* species (*A. picea* and *A. rudis*). With specific regard to genome size, the strong correlation with minimum temperature points to altered genome size as a potential indicator of a mechanism for adaptation to cold. The findings of a recent, broad analysis of insect genome patterns (Alfsnes et al., 2017) has demonstrated support for climatic constraints to genome size. One hypothesis being that cold temperatures could select for smaller genomes (Mousseau, 1997; Petrov, 2001; Alfsnes et al., 2017).

It is important to consider that these biogeographic patterns could be a function of other factors not examined in this study. We examined the role of both space and climate; however, given the small sample size of ant genomes we did not statistically control for phylogeny. The genomic patterns we observed are likely to be a function of both phylogeny and ecological variation, as previous research has observed significant climate variation in insect genomes even after controlling for phylogenetic relatedness (Alfsnes et al., 2017). However, future work should disentangle the partial correlations of phylogenetics and biogeographic variation in ant genomes, once more sequences become available. In addition, interactions of ants with other organisms are likely a strong factor at play that could be a function of or interact with both space and climate. For example, the distribution of the species *Atta texana* is limited by the cold-tolerance of its fungal symbiont, cultivars of the genus *Attamyces* (Mueller et al., 2011). The evolution of the ant-fungus relationship has lead to reductions in some ant species ranges by



246 cold temperatures. We observed patterns corroborating this in our analysis in the correlation between  
247 temperature variables and the clustering of similar genomes of ant species from the tribe Attini (see Fig 6).

248 Further work investigating the variation in genomic content and mapping of target coding regions  
249 from from previous experimental physiological (Nguyen et al., 2017), biochemical (Helms Cahan et al.,  
250 2017), and transcriptomic (Stanton-Geddes et al., 2016) work on *Aphaenogaster* and other ant species  
251 will inform predictions of how these species and the ecosystems that they inhabit may respond to ongoing  
252 climatic change. For example, determining the genomic factors underlying the temperature response  
253 of ant assemblages to climatic gradients (Warren and Chick, 2013; Diamond et al., 2016, 2017) could  
254 provide useful insights into the response of these important organisms to non-analog ecosystem states and  
255 idiosyncratic community responses (Bewick et al., 2014). Also, as species distribution models have been  
256 significantly improved by the inclusion of genetic information (Ikeda et al., 2016), an ecological genetics  
257 approach that couples ant genomic and ecologically relevant data will likely provide a useful window into  
258 the response of a range of terrestrial ecosystems to climatic change.

## 259 CONCLUSION

260 The addition of the *Aphaenogaster* sequences have increased the breadth of global ant genomic sampling.  
261 The total number of ant sequences analyzed here is still a relatively small sample ( $n = 26$ ) of the estimated  
262  $>16,000$  ant species and subspecies (www.antweb.org, accessed 16 April 2018). As the addition of the  
263 *Aphaenogaster* sequences had a marked impact on the statistical results of the climate analysis, we expect  
264 that further sequencing work will continue to shift our perspective of the ecological genomics of ants.  
265 Although our analysis did include some statistical control of spatial-autocorrelation, these results are still  
266 correlative and do not eliminate other important factors that might covary with climate, such as phylogeny.  
267 Additional analytical and experimental work will be necessary to parse out a clearer understanding of the  
268 mechanisms behind these patterns. New sequencing work has been initiated by The Global Ant Genomics  
269 Alliance (Boomsma et al., 2017), which aims to greatly increase the number of ant species sequenced  
270 from across the world. These efforts will enhance our ability to resolve a clearer picture of the future  
271 impacts of global climate change.

## 272 ACKNOWLEDGMENTS

273 Thank you to the team at the Broad Institute: particularly, James Bochicchio, Sarah Young, Terrance Shay  
274 and Caroline Cusick. This work was supported by a US National Science Foundation Dimensions of  
275 Biodiversity grant (DEB 11-36646) to NJS, RRD, AME, NJG and SHC.

## REFERENCES

- Agosti, D., Majer, J. D., Alonso, L. E., and Schultz, T. R. (2000). *Standard methods for measuring and monitoring biodiversity*, volume 233. Smithsonian Institution Press.
- Alfsnes, K., Leinaas, H. P., and Hessen, D. O. (2017). Genome size in arthropods; different roles of phylogeny, habitat and life history in insects and crustaceans. *Ecol. Evol.*, 7(15):5939–5947.
- Anderson, M. J. (2001). A new method for non-parametric multivariate analysis of variance. *Austral Ecol.*, 26(1):32–46.
- Bewick, S., Stuble, K. L., Lessard, J.-P., Dunn, R. R., Adler, F. R., and Sanders, N. J. (2014). Predicting future coexistence in a North American ant community. *Ecol. Evol.*, 4(10):1804–1819.
- Bolton, B. (2006). *Bolton's catalogue of ants of the world, 1758-2005*. Harvard University Press.
- Boomsma, J. J., Brady, S. G., Dunn, R. R., Gadau, J., Heinze, J., Keller, L., Moreau, C. S., Sanders, N. J., Schrader, L., Schultz, T. R., Sundström, L., Ward, P. S., Wcislo, W. T., and Zhang, G. (2017). The Global Ant Genomics Alliance (GAGA). *Myrmecological News*, 25:61–66.
- Brown, P. T. and Caldeira, K. (2017). Greater future global warming inferred from Earth's recent energy budget. *Nature*, 552(7683):45–50.
- Burrows, M. T., Schoeman, D. S., Richardson, A. J., Molinos, J. G., Hoffmann, A., Buckley, L. B., Moore, P. J., Brown, C. J., Bruno, J. F., Duarte, C. M., Halpern, B. S., Hoegh-Guldberg, O., Kappel, C. V., Kiessling, W., O'Connor, M. I., Pandolfi, J. M., Parmesan, C., Sydeman, W. J., Ferrier, S., Williams, K. J., and Poloczanska, E. S. (2014). Geographical limits to species-range shifts are suggested by climate velocity. *Nature*, 507(7493):492–495.
- Del Toro, I., Ribbons, R. R., and Pelini, S. L. (2012). The little things that run the world revisited: A review of ant-mediated ecosystem services and disservices (Hymenoptera: Formicidae).
- DeMarco, B. B. and Cognato, A. I. (2016). A multiple-gene phylogeny reveals polyphyly among eastern North American *Aphaenogaster* species (Hymenoptera: Formicidae). *Zool. Scr.*, 45(5):512–520.
- Diamond, S. E., Chick, L., Penick, C. A., Nichols, L. M., Cahan, S. H., Dunn, R. R., Ellison, A. M., Sanders, N. J., and Gotelli, N. J. (2017). Heat tolerance predicts the importance of species interaction effects as the climate changes. *Integr. Comp. Biol.*, 57(1):112–120.
- Diamond, S. E. and Chick, L. D. (2018). Thermal specialist ant species have restricted, equatorial geographic ranges: Implications for climate change vulnerability and risk of extinction. *Ecography (Cop.)*.
- Diamond, S. E., Nichols, L. M., Pelini, S. L., Penick, C. A., Barber, G. W., Cahan, S. H., Dunn, R. R., Ellison, A. M., Sanders, N. J., and Gotelli, N. J. (2016). Climatic warming destabilizes forest ant

communities. *Sci. Adv.*, 2(10):e1600842–e1600842.

Diamond, S. E., Sorger, D. M., Hulcr, J., Pelini, S. L., Toro, I. D., Hirsch, C., Oberg, E., and Dunn, R. R. (2012). Who likes it hot? A global analysis of the climatic, ecological, and evolutionary determinants of warming tolerance in ants. *Glob. Chang. Biol.*, 18(2):448–456.

Efron, B. and Tibshirani, R. (2007). On testing the significance of sets of genes. *Ann. Appl. Stat.*, 1(1):107–129.

Ellison, A. M. (2012). *A field guide to the ants of New England*. Yale University Press.

Fick, S. E. and Hijmans, R. J. (2017). WorldClim 2: new 1-km spatial resolution climate surfaces for global land areas. *Int. J. Climatol.*, 37(12):4302–4315.

Gnerre, S., Maccallum, I., Przybylski, D., Ribeiro, F. J., Burton, J. N., Walker, B. J., Sharpe, T., Hall, G., Shea, T. P., Sykes, S., Berlin, A. M., Aird, D., Costello, M., Daza, R., Williams, L., Nicol, R., Gnirke, A., Nusbaum, C., Lander, E. S., and Jaffe, D. B. (2011). High-quality draft assemblies of mammalian genomes from massively parallel sequence data. *Proc. Natl. Acad. Sci. U. S. A.*, 108(4):1513–8.

Goslee, S. C. and Urban, D. L. (2007). The ecodist Package for Dissimilarity-based Analysis of Ecological Data. *J. Stat. Softw.*, 22(7):1–19.

Helms Cahan, S., Nguyen, A. D., Stanton-Geddes, J., Penick, C. A., Hernáiz-Hernández, Y., DeMarco, B. B., and Gotelli, N. J. (2017). Modulation of the heat shock response is associated with acclimation to novel temperatures but not adaptation to climatic variation in the ants *Aphaenogaster picea* and *A. rudis*. *Comp. Biochem. Physiol. Part A Mol. Integr. Physiol.*, 204:113–120.

Hultgren, K. M., Jeffery, N. W., Moran, A., and Gregory, T. R. (2018). Latitudinal variation in genome size in crustaceans. *Biol. J. Linn. Soc.*, 123(2):348–359.

Hultine, K. R., Grady, K. C., Wood, T. E., Shuster, S. M., Stella, J. C., and Whitham, T. G. (2016). Climate change perils for dioecious plant species. *Nat. Plants*, 2(8).

Ikeda, D. H., Max, T. L., Allan, G. J., Lau, M. K., Shuster, S. M., and Whitham, T. G. (2016). Genetically informed ecological niche models improve climate change predictions. *Glob. Chang. Biol.*, 23(1):164–176.

Moreau, C. S. (2006). Phylogeny of the Ants: Diversification in the Age of Angiosperms. *Eur. J. Biochem. Eur. J. Biochem. J. Steroid Biochem. Mol. Cell Nat. Sci. N. Gompel, B. Prud’hom. Nat. J. Piatigorsky, Ann. N.Y. Acad. Sci. Sci.*, 101(281):1249–481.

Mousseau, T. A. (1997). Ectotherms Follow the Converse to Bergmann’s Rule. *Evolution (N. Y.)*, 51(2):630.

Mueller, U. G., Mikheyev, A. S., Hong, E., Sen, R., Warren, D. L., Solomon, S. E., Ishak, H. D., Cooper, M., Miller, J. L., Shaffer, K. A., and Juenger, T. E. (2011). Evolution of cold-tolerant fungal symbionts

permits winter fungiculture by leafcutter ants at the northern frontier of a tropical ant-fungus symbiosis. *Proc. Natl. Acad. Sci.*, 108(10):4053–4056.

Neafsey, D. E., Lawniczak, M. K. N., Park, D. J., Redmond, S. N., Coulibaly, M. B., Traoré, S. F., Sagnon, N., Costantini, C., Johnson, C., Wiegand, R. C., Collins, F. H., Lander, E. S., Wirth, D. F., Kafatos, F. C., Besansky, N. J., Christophides, G. K., and Muskavitch, M. A. T. (2010). SNP genotyping defines complex gene-flow boundaries among African malaria vector mosquitoes. *Science*, 330(6003):514–517.

Nguyen, A. D., DeNovellis, K., Resendez, S., Pustilnik, J. D., Gotelli, N. J., Parker, J. D., and Cahan, S. H. (2017). Effects of desiccation and starvation on thermal tolerance and the heat-shock response in forest ants. *J. Comp. Physiol. B*, 187(8):1107–1116.

Nygaard, S. and Wurm, Y. (2015). Ant genomics (Hymenoptera: Formicidae): Challenges to overcome and opportunities to seize. *Myrmecological News*, 21:59–72.

Oksanen, J., Blanchet, F., Kindt, R., Legendre, P., and O’Hara, R. (2016). Vegan: community ecology package.

Ondov, B. D., Treangen, T. J., Melsted, P., Mallonee, A. B., Bergman, N. H., Koren, S., and Phillippy, A. M. (2016). Mash: fast genome and metagenome distance estimation using MinHash. *Genome Biol.*, 17(1):132.

Parmesan, C. (2006). Ecological and Evolutionary Responses to Recent Climate Change. *Annu. Rev. Ecol. Evol. Syst.*, 37(1):637–669.

Pelini, S. L., Diamond, S. E., Nichols, L. M., Stuble, K. L., Ellison, A. M., Sanders, N. J., Dunn, R. R., and Gotelli, N. J. (2014). Geographic differences in effects of experimental warming on ant species diversity and community composition. *Ecosphere*, 5(10):art125.

Penick, C. A., Diamond, S. E., Sanders, N. J., and Dunn, R. R. (2017). Beyond thermal limits: comprehensive metrics of performance identify key axes of thermal adaptation in ants. *Funct. Ecol.*, 31(5):1091–1100.

Petrov, D. A. (2001). Evolution of genome size: new approaches to an old problem. *Trends Genet.*, 17(1):23–28.

R Core Team (2017). R Core Team (2017). R: A language and environment for statistical computing. *R Found. Stat. Comput. Vienna, Austria*. URL <http://www.R-project.org/>, page R Foundation for Statistical Computing.

Siddig, A. A., Ellison, A. M., Ochs, A., Villar-Leeman, C., and Lau, M. K. (2016). How do ecologists select and use indicator species to monitor ecological change? Insights from 14 years of publication in Ecological Indicators. *Ecol. Indic.*, 60:223–230.

Spicer, M. E., Stark, A. Y., Adams, B. J., Kneale, R., Kaspari, M., and Yanoviak, S. P. (2017). Thermal

constraints on foraging of tropical canopy ants. *Oecologia*, 183(4):1007–1017.

Stanton-Geddes, J., Nguyen, A., Chick, L., Vincent, J., Vangala, M., Dunn, R. R., Ellison, A. M., Sanders, N. J., Gotelli, N. J., and Helms Cahan, S. (2016). Thermal reactionomes reveal divergent responses to thermal extremes in warm and cool-climate ant species. *BMC Genomics*, 17(1):171–186.

Tsutsui, N. D., Suarez, A. V., Spagna, J. C., Johnston, J. S., Gregory, T., Evans, J., Gundersen-Rindal, D., Gardner, T., Gregory, T., Wilson, E., Hölldobler, B., Wilson, E., Li, J., Heinz, K., Johnston, J., Ross, L., Beani, L., Hughes, D., Kathirithamby, J., Geraci, N., Johnston, J., Robinson, J., Wikel, S., Hill, C., Gregory, T., Bennett, M., Leitch, I., SanMiguel, P., Gaut, B., Tikhonov, A., Nakajima, Y., Bennetzen, J., Kazazian, H., Kidwell, M., Comeron, J., Ustinova, J., Achmann, R., Cremer, S., Mayer, F., Hancock, J., Hancock, J., Toth, G., Gaspari, Z., Jurka, J., Redon, R., Ishikawa, S., Fitch, K., Feuk, L., Perry, G., Andrews, T., Fiegler, H., Shapero, M., Carson, A., Chen, W., Cho, E., Dallaire, S., Freeman, J., Gonzalez, J., Gratacos, M., Huang, J., Kalaitzopoulos, D., Komura, D., MacDonald, J., Marshall, C., Mei, R., Montgomery, L., Nishimura, K., Okamura, K., Shen, F., Somerville, M., Tchinda, J., Valsesia, A., Woodwark, C., Yang, F., Zhang, J., Zerjal, T., Zhang, J., Armengol, L., Conrad, D., Estivill, X., Tyler-Smith, C., Carter, N., Aburatani, H., Lee, C., Jones, K., Scherer, S., Hurles, M., Gregory, T., Gregory, T., Petrov, D., Lozovskaya, E., Hartl, D., Devos, K., Brown, J., Bennetzen, J., Bennetzen, J., Ma, J., Devos, K., Ma, J., Bennetzen, J., Oliver, M., Petrov, D., Ackerly, D., Falkowski, P., Schofield, O., Gregory, T., Hebert, P., Kolasa, J., Finston, T., Hebert, P., Footit, R., Ferrari, J., Rai, K., Ellegren, H., Vandenbussche, R., Longmire, J., Baker, R., Organ, C., Shedlock, A., Meade, A., Pagel, M., Edwards, S., Hughes, A., Hughes, M., Reinhold, K., Gregory, T., Pittendrigh, B., Clark, J., Johnston, J., Lee, S., Romero-Severson, J., Dasch, G., Gregory, T., Weinstock, G., Robinson, G., Gibbs, R., Worley, K., Evans, J., Maleszka, R., Robertson, H., Weaver, D., Beye, M., Bork, P., Elsik, C., Hartfelder, K., Hunt, G., Zdobnov, E., Amdam, G., Bitondi, M., Collins, A., Cristino, A., Lattorff, H., Lobo, C., Moritz, R., Nunes, F., Page, R., Simoes, Z., Wheeler, D., Carninci, P., Fukuda, S., Hayashizaki, Y., Kai, C., Kawai, J., Sakazume, N., Sasaki, D., Tagami, M., Albert, S., Baggerman, G., Beggs, K., Bloch, G., Cazzamali, G., Cohen, M., Drapeau, M., Eisenhardt, D., Emore, C., Ewing, M., Fahrbach, S., Foret, S., Grimmlikhuijzen, C., Hauser, F., Hummon, A., Huybrechts, J., Jones, A., Kadowaki, T., Kaplan, N., Kucharski, R., Lebouille, G., Linial, M., Littleton, J., Mercer, A., Richmond, T., Rodriguez-Zas, S., Rubin, E., Sattelle, D., Schlupalius, D., Schoofs, L., Shemesh, Y., Sweedler, J., Velarde, R., Verleyen, P., Vierstraete, E., Williamson, M., Ament, S., Brown, S., Corona, M., Dearden, P., Dunn, W., Elekonich, M., Fujiyuki, T., Gattermeier, I., Gempe, T., Hasselmann, M., Kadowaki, T., Kage, E., Kamikouchi, A., Kubo, T., Kucharski, R., Kunieda, T., Lorenzen, M., Milshina, N., Morioka, M., Ohashi, K., Overbeek, R., Ross, C., Schioett, M., Shippy, T., Takeuchi, H., Toth, A., Willis, J., Wilson, M., Gordon, K.,

408 Letunic, I., Hackett, K., Peterson, J., Felsenfeld, A., Guyer, M., Solignac, M., Agarwala, R., Cornuet,  
409 J., Monnerot, M., Mougél, F., Reese, J., Vautrin, D., Gillespie, J., Cannone, J., Gutell, R., Johnston,  
410 J., Eisen, M., Iyer, V., Iyer, V., Kosarev, P., Mackey, A., Solovyev, V., Souvorov, A., Aronstein, K.,  
411 Bilikova, K., Chen, Y., Clark, A., Decanini, L., Gelbart, W., Hetru, C., Hultmark, D., Imler, J., Jiang,  
412 H., Kanost, M., Kimura, K., Lazzaro, B., Lopez, D., Simuth, J., Thompson, G., Zou, Z., Jong, P. D.,  
413 Sodergren, E., Csuros, M., Milosavljevic, A., Osoegawa, K., Richards, S., Shu, C., Duret, L., Elhaik, E.,  
414 Graur, D., Anzola, J., Campbell, K., Childs, K., Collinge, D., Crosby, M., Dickens, C., Grametes, L.,  
415 Grozinger, C., Jones, P., Jorda, M., Ling, X., Matthews, B., Miller, J., Mizzen, C., Peinado, M., Reid, J.,  
416 Russo, S., Schroeder, A., Pierre, S. S., Wang, Y., Zhou, P., Jiang, H., Kitts, P., Ruef, B., Venkatraman,  
417 A., Zhang, L., Aquino-Perez, G., Whitfield, C., Behura, S., Berlocher, S., Sheppard, W., Smith, D.,  
418 Suarez, A., Tsutsui, N., Wei, X., Wheeler, D., Havlak, P., Li, B., Liu, Y., Sodergren, E., Jolivet, A., Lee,  
419 S., Nazareth, L., Pu, L., Thorn, R., Stolc, V., Newman, T., Samanta, M., Tongprasit, W., Claudianos,  
420 C., Berenbaum, M., Biswas, S., de Graaf, D., Feyereisen, R., Johnson, R., Oakeshott, J., Ranson, H.,  
421 Schuler, M., Muzny, D., Chacko, J., Davis, C., Dinh, H., Gill, R., Hernandez, J., Hines, S., Hume,  
422 J., Jackson, L., Kovar, C., Lewis, L., Miner, G., Morgan, M., Nguyen, N., Okwuonu, G., Paul, H.,  
423 Santibanez, J., Savery, G., Svatek, A., Villasana, D., Wright, R., Consort, H., Moreau, C., Bell, C.,  
424 Vila, R., Archibald, S., Pierce, N., Brady, S., Schultz, T., Fisher, B., Ward, P., Mueller, U., Gerardo, N.,  
425 Aanen, D., Six, D., Schultz, T., Chapela, I., Rehner, S., Schultz, T., Mueller, U., Wetterer, J., Schultz,  
426 T., Meier, R., Gregory, T., Hebert, P., Gregory, T., Shorthouse, D., Wang, J., Jemielity, S., Uva, P.,  
427 Wurm, Y., Graff, J., Keller, L., Bennett, M., Leitch, I., Price, H., Johnston, J., Abouheif, E., Reeve, J.,  
428 Abouheif, E., Felsenstein, J., Purvis, A., and Rambaut, A. (2008). The evolution of genome size in ants.  
429 *BMC Evol. Biol.*, 8(1):64.

430 Walker, B. J., Abeel, T., Shea, T., Priest, M., Abouelliel, A., Sakthikumar, S., Cuomo, C. A., Zeng, Q.,  
431 Wortman, J., Young, S. K., and Earl, A. M. (2014). Pilon: An Integrated Tool for Comprehensive  
432 Microbial Variant Detection and Genome Assembly Improvement. *PLoS One*, 9(11):e112963.

433 Ward, P. S. (2014). The Phylogeny and Evolution of Ants. *Annu. Rev. Ecol. Evol. Syst.*, 45(1):23–43.

434 Ward, P. S., Brady, S. G., Fisher, B. L., and Schultz, T. R. (2015). The evolution of myrmicine ants:  
435 phylogeny and biogeography of a hyperdiverse ant clade (Hymenoptera: Formicidae). *Syst. Entomol.*,  
436 40(1):61–81.

437 Warren, R. J. and Chick, L. (2013). Upward ant distribution shift corresponds with minimum, not  
438 maximum, temperature tolerance. *Glob. Chang. Biol.*, 19(7):2082–2088.



439 **SUPPLEMENTARY MATERIALS**

|                      | <i>df</i> | <i>SS</i> | <i>MS</i> | <i>Pseudo-F</i> | <i>R</i> <sup>2</sup> | <i>p-value</i> |
|----------------------|-----------|-----------|-----------|-----------------|-----------------------|----------------|
| <i>Size Distance</i> |           |           |           |                 |                       |                |
| Lat                  | 1         | 2707.43   | 2707.43   | 2.11            | 0.07                  | 0.1796         |
| Lon                  | 1         | 1759.79   | 1759.79   | 1.37            | 0.05                  | 0.2693         |
| MAT                  | 1         | 118.64    | 118.64    | 0.09            | 0.00                  | 0.7636         |
| Tmin                 | 1         | 3394.10   | 3394.10   | 2.65            | 0.09                  | 0.1434         |
| Tmax                 | 1         | 5518.63   | 5518.63   | 4.31            | 0.14                  | 0.0727         |
| PA                   | 1         | 8349.14   | 8349.14   | 6.52            | 0.21                  | 0.0363         |
| PS                   | 1         | 5501.51   | 5501.51   | 4.29            | 0.14                  | 0.0679         |
| Residuals            | 9         | 11533.39  | 1281.49   |                 | 0.30                  |                |
| Total                | 16        | 38882.63  |           |                 | 1.00                  |                |
| <i>MASH Distance</i> |           |           |           |                 |                       |                |
| Lat                  | 1         | 0.02      | 0.02      | 1.66            | 0.08                  | 0.0683         |
| Lon                  | 1         | 0.02      | 0.02      | 2.07            | 0.10                  | 0.0295         |
| MAT                  | 1         | 0.02      | 0.02      | 1.95            | 0.10                  | 0.0332         |
| Tmin                 | 1         | 0.01      | 0.01      | 1.06            | 0.05                  | 0.3679         |
| Tmax                 | 1         | 0.01      | 0.01      | 1.43            | 0.07                  | 0.1483         |
| PA                   | 1         | 0.01      | 0.01      | 1.38            | 0.07                  | 0.1590         |
| PS                   | 1         | 0.02      | 0.02      | 1.56            | 0.08                  | 0.0871         |
| Residuals            | 9         | 0.09      | 0.01      |                 | 0.45                  |                |
| Total                | 16        | 0.19      |           |                 | 1.00                  |                |

**Table 1.** PerMANOVA pseudo-F table for the analysis of the factors correlated with ant genome size and similarity (MASH distance) only including the previously sequenced NCBI ant specimens.
